# Supplementary material
Source: Springer Nature journal article supplement (https://www.springermedizin.de/resource/supplementary/12936_2014_3176_MOESM4_ESM.pdf/9545226)
Supplement: MOESM4 [file 9545226]

Under 5 years of age

5 to 14 years of age

15 years of age and above

### LUANGWA DISTRICT

### NYIMBA DISTRICT

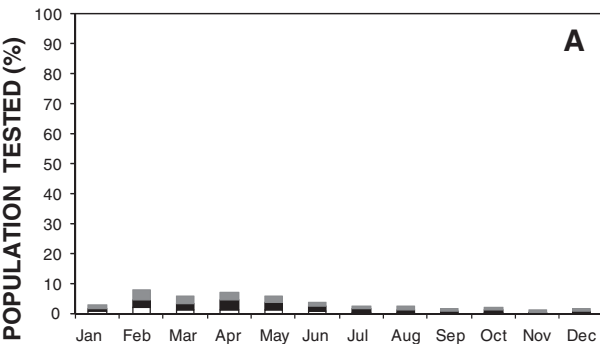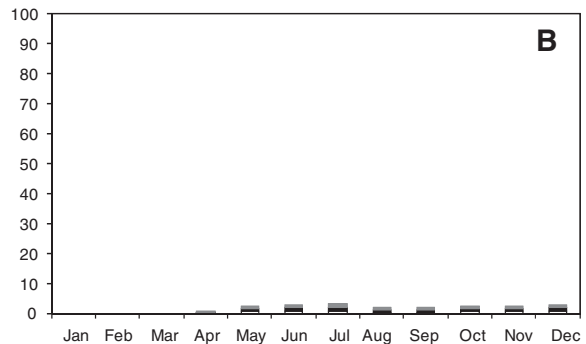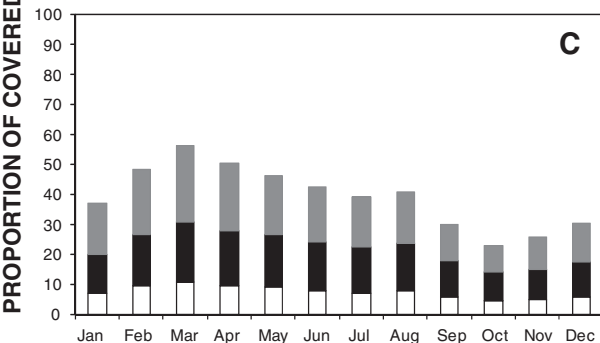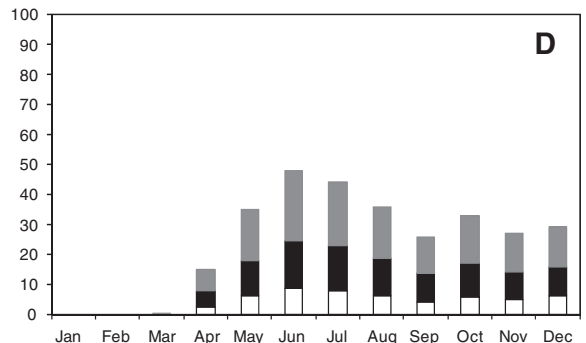

PASSIVE DETECTION

ACTIVE DETECTION

TIME (Calendar month)
